# Supplementary material for: Dual Lactate Clearance in the Viability Assessment of Livers Donated After Circulatory Death With Ex Situ Normothermic Machine Perfusion
Source: PubMed Central journal article supplement — Transplant Direct. 2021 Nov 17;7(12):e789. doi: 10.1097/TXD.0000000000001243 (PMC8601326; doi:10.1097/txd.0000000000001243), 2021-11-17

Suppl. Table 1

| Parameter\Group                      | All livers (N=10)      | Liver with sLC (n=5)   | Liver with nLC (n=5) | p-value |
|--------------------------------------|------------------------|------------------------|----------------------|---------|
| Age (years)                          | 33.8±14.3              | 40.0±17.2              | 27.6±8.3             | 0.1854  |
| Sex                                  | Male (60%)             | Male (60%)             | Male (60%)           | 1.0000  |
|                                      | Female (40%)           | Female (40%)           | Female (40%)         |         |
| Race                                 | Caucasian (90%)        | Caucasian (80%)        | Caucasian (100%)     | 1.0000  |
|                                      | African American (10%) | African American (20%) | African American (0) |         |
| Cause of Death                       | Anoxia (60%)           | Anoxia (20%)           | Anoxia (100%)        | 0.0476  |
|                                      | Head trauma (30%)      | Head trauma (60%)      | Head trauma (0)      | 0.1667  |
|                                      | Stroke (10%)           | Stroke (20%)           | Stroke (0)           | 1.0000  |
| Type of Donor                        | DCD (90%)              | DCD (80%)              | DCD (100%)           | 1.0000  |
|                                      | DCD (10%)              | DCD (20%)              | DCD (0)              |         |
| BMI (kg/m <sup>2</sup> )             | 28.3±8.6               | 29.2±9.5               | 27.4±8.7             | 0.7653  |
| WIT (minutes)                        | 29.4±11.8              | 25±9.3                 | 33.0±13.4            | 0.3457  |
| fWIT (SBP<70, minutes)               | 17.7±6.3               | 14.8±1.7               | 20.2±7.8             | 0.2174  |
| fWIT (SaO <sub>2</sub> <80, minutes) | 27.0±12.4              | 24.0±9.6               | 29.4±14.9            | 0.5525  |
| Declaration-CC time (minutes)        | 10.0±3.2               | 9.8±3.6                | 10.2±3.8             | 0.8498  |
| CIT (minutes)                        | 322.8±98.6             | 350.6±122.4            | 295.0±70.3           | 0.4042  |
| Liver weight before NMP (kg)         | 2.3±0.7                | 2.3±0.5                | 2.5±1.2              | 0.7473  |
| Liver weight after NMP (kg)          | 2.3±0.7                | 2.2±0.5                | 2.3±1.0              | 0.7727  |
| NMP duration (hours)                 | 10.9±7.9               | 15.6±9.1               | 6.2±1.8              | 0.0532  |
| Bicarbonate used (mL)                | 38.0±12.3              | 33.0±12.1              | 43.0±11.5            | 0.2163  |
| Bile production (mL)                 | 68.0±110.9             | 121.6±142.5            | 14.4±13.6            | 0.1327  |

Suppl. Fig1

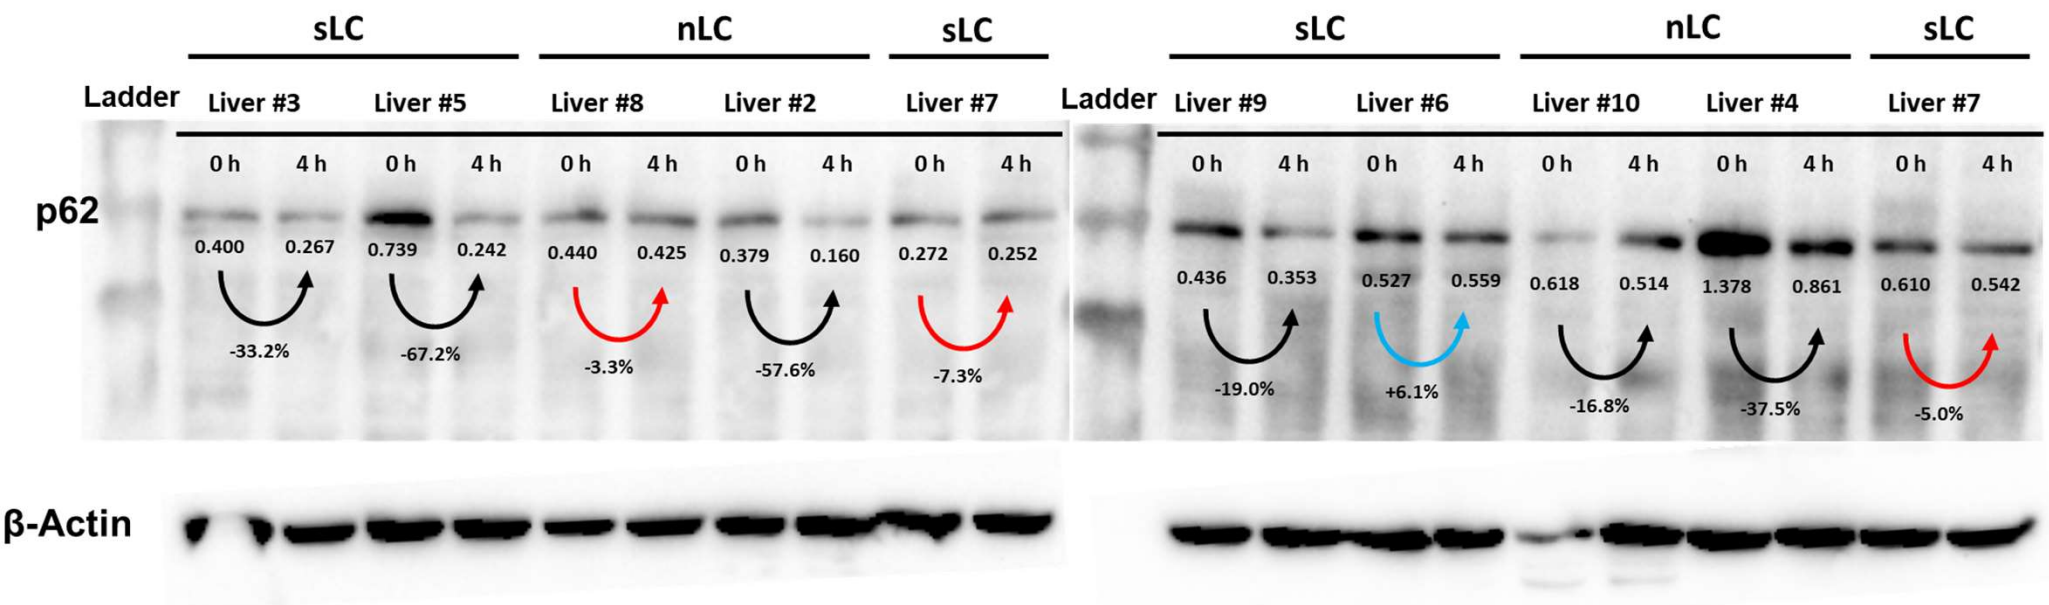

Supplement: txd-7-e789-s001.pdf [file txd-7-e789-s001.pdf]
